# Supplementary material for: An antifouling and antiviral superhydrophobic elastomer formed by 3D printing and a peptide-based coating
Source: Royal Society of Chemistry journal article supplement (doi:10.1039/d4ma00620h), 2024-01-01
Supplement: d4ma00620h1.pdf [file d4ma00620h1.pdf]

## An antifouling and antiviral superhydrophobic elastomer formed by 3D-printing and a peptide-based coating

Tan Hu<sup>ab</sup>, Noa Trink<sup>ab</sup>, Shlomo Magdassi<sup>ab\*</sup> and Meital Reches<sup>ab\*</sup>

- a. Institute of Chemistry and The Center for Nanoscience and Nanotechnology, The Hebrew University of Jerusalem, Jerusalem 9190401, Israel
- b. Singapore-HUJ Alliance for Research and Enterprise (SHARE), Smart Grippers for Soft Robotics (SGSR), Campus for Research Excellence and Technological Enterprise (CREATE), Singapore, 138602, Singapore

**Table S1: Printing parameters for Asiga Max X35**

| <b>Build Parameters</b>              | <b>Value</b>         |
|--------------------------------------|----------------------|
| Light intensity                      | 25mW/cm <sup>2</sup> |
| Slice Thickness                      | 0.025 mm             |
| Burn-in layers                       | 2 layers             |
| Separation distance                  | 15                   |
| Separation velocity                  | 0.8                  |
| Approach velocity                    | 1                    |
| Exposure (burning time)              | 10 sec               |
| Exposure time                        | 1.2 sec              |
| Normal wait time (after exposure)    | 3 sec                |
| Normal wait time (after separation)  | 0 sec                |
| Normal wait time (after approach)    | 0 sec                |
| Normal Approach Pressure Limit       | 100                  |
| Burn-in wait time (after exposure)   | 3 sec                |
| Burn-in wait time (after separation) | 5 sec                |
| Burn-in wait time (after approach)   | 0 sec                |
| Burn-in Approach Pressure Limit      | 100                  |
| LED wavelength                       | 385 nm               |
| Pixel size                           | 0.035 mm             |
